# Supplementary material for: A Longitudinal Study of Child Maltreatment and Mental Health Predictors of Admission to Psychiatric Residential Treatment Facilities
Source: MDPI journal article supplement (doi:10.3390/ijerph14101141), 2017-09-28
Supplement: s1 [file s1]

**Table S1.** ICD-9 Behavioral Health Diagnoses Associated with Trauma

| ICD9   | Description                                                                  |
|--------|------------------------------------------------------------------------------|
| V61.12 | Physical Abuse of Adult (if by partner)                                      |
| V61.12 | Sexual Abuse of Adult (if by partner)                                        |
| V61.20 | Parent-Child Relational Problem                                              |
| V61.21 | Neglect of Child                                                             |
| V61.21 | Physical Abuse of Child                                                      |
| V61.21 | Sexual Abuse of Child                                                        |
| V62.3  | Academic Problem                                                             |
| V62.83 | Physical Abuse of Adult (if by person other than partner)                    |
| V62.83 | Sexual Abuse of Adult (if by person other than partner)                      |
| 293.83 | Mood Disorder Due to...[Indicate the General Medical Condition]              |
| 293.84 | Anxiety Disorder Due to...[Indicate the General Medical Condition]           |
| 296.2  | Major Depressive Disorder, Single Episode, Unspecified                       |
| 296.21 | Major Depressive Disorder, Single Episode, Mild                              |
| 296.22 | Major Depressive Disorder, Single Episode, Moderate                          |
| 296.23 | Major Depressive Disorder, Single Episode, Severe without Psychotic Features |
| 296.24 | Major Depressive Disorder, Single Episode, Severe with Psychotic Features    |
| 296.25 | Major Depressive Disorder, Single Episode, In Partial Remission              |
| 296.26 | Major Depressive Disorder, Single Episode, In Full Remission                 |
| 296.3  | Major Depressive Disorder, Recurrent, Unspecified                            |
| 296.31 | Major Depressive Disorder, Recurrent, Mild                                   |
| 296.32 | Major Depressive Disorder, Recurrent, Moderate                               |
| 296.33 | Major Depressive Disorder, Recurrent, Severe without Psychotic Features      |
| 296.34 | Major Depressive Disorder, Recurrent, Severe with Psychotic Features         |
| 296.35 | Major Depressive Disorder, Recurrent, In Partial Remission                   |
| 296.36 | Major Depressive Disorder, Recurrent, In Full Remission                      |
| 296.9  | Mood Disorder NOS                                                            |
| 300    | Anxiety Disorder NOS                                                         |
| 300.02 | Generalized Anxiety Disorder                                                 |
| 300.3  | Obsessive-Compulsive Disorder                                                |
| 300.4  | Dysthymic Disorder                                                           |
| 308.3  | Acute Stress Disorder                                                        |
| 309    | Adjustment Disorder with Depressed Mood                                      |
| 309.21 | Separation Anxiety Disorder                                                  |
| 309.24 | Adjustment Disorder with Anxiety                                             |
| 309.28 | Adjustment Disorder with Mixed Anxiety and Depressed Mood                    |
| 309.3  | Adjustment Disorder with Disturbance of Conduct                              |
| 309.4  | Adjustment Disorder with Mixed Disturbance of Emotions and Conduct           |
| 309.81 | Posttraumatic Stress Disorder                                                |

- 309.9 Adjustment Disorder Unspecified
- 311 Depressive Disorder NOS
- 312.81 Conduct Disorder, Childhood Onset Type
- 312.82 Conduct Disorder, Adolescent Onset Type
- 312.89 Other Conduct Disorder
- 313.89 Reactive Attachment Disorder of Infancy or Early Childhood
- 313.9 Disorder of Infancy, Childhood, or Adolescence NOS
- 314 Attention-Deficit/Hyperactivity Disorder, Predominantly Inattentive Type
- 314.01 Attention-Deficit/Hyperactivity Disorder, Combined Type
- 314.01 Attention-Deficit/Hyperactivity Disorder, Predominantly Hyperactive-Impulsive Type
- 314.9 Attention-Deficit/Hyperactivity Disorder NOS
- 315 Reading Disorder
- 315.32 Mixed Receptive-Expressive Language Disorder
- 317 Mild Mental Retardation
- 318 Moderate Mental Retardation
- 318.1 Severe Mental Retardation
- 318.2 Profound Mental Retardation
- 319 Mental Retardation, Severity Unspecified
- 995.52 Neglect of Child (if focus of attention is on victim)
- 995.53 Sexual Abuse of Child (if focus of attention is on victim)
- 995.54 Physical Abuse of Child (if focus of attention is on victim)
- 995.81 Physical Abuse of Adult (if focus of attention is on victim)
- 995.83 Sexual Abuse of Adult (if focus of attention is on victim)
